# Supplementary material for: Prematurity and Long-Term Respiratory Morbidity—What Is the Critical Gestational Age Threshold?
Source: MDPI journal article supplement (doi:10.3390/jcm11030751), 2022-01-30
Supplement: s1 [file s1]

**Table S1.** ICD-9 Codes for pediatric respiratory morbidity

| <b>GROUPS</b>                                    | <b>DIAG. CODE</b> | <b>DIAGNOSIS DESCRIPTION</b>                                                                         |
|--------------------------------------------------|-------------------|------------------------------------------------------------------------------------------------------|
| <b>ASTHMA</b>                                    | 49300             | EXTRINSIC ASTHMA, UNSPECIFIED                                                                        |
|                                                  | 49320             | CHR. OBSTRUCTIVE ASTHMA, UNSPECIFIED                                                                 |
|                                                  | 49321             | CHR. OSBTRUCTIVE ASTHMA WITH STATUS ASTHMATICUS                                                      |
|                                                  | 49390             | ASTHMA, UNSPECIFIED                                                                                  |
|                                                  | 49390             | ASTHMA, UNSPECIFIED TYPE, WITHOUT MENTION OF STATUS ASTHMATICUS                                      |
|                                                  | 49390             | ASTHMA, UNSPECIFIED TYPE, WITHOUT MENTION OF STATUS ASTHMATICUS OR ACUTE EXACERBATION OR UNSPECIFIED |
|                                                  | 49391             | ASTHMA, UNSPECIFIED TYPE, WITH STATUS ASTHMATICUS                                                    |
|                                                  | 49392             | UNSPECIFIED ASTHMA WITH (ACUTE) EXACERBATION                                                         |
|                                                  | 496               | CHRONIC AIRWAY OBSTRUCTION, NOT ELSEWHERE CLASSIFIED                                                 |
| <b>STRUCTURAL - EMPHYSEMA</b>                    | 4920              | EMPHYSEMATOUS BLEB                                                                                   |
|                                                  | 4928              | OTHER EMPHYSEMA                                                                                      |
|                                                  | 5100              | EMPHYEMA WITH FISTULA                                                                                |
|                                                  | 5109              | EMPHYEMA WITHOUT MENTION OF FISTULA                                                                  |
|                                                  | 5181              | INTERSTITIAL EMPHYSEMA                                                                               |
| <b>BRONCHIECTASIS - FIBROSIS - HEMOSIDEROSIS</b> | 494               | BRONCHIECTASIS                                                                                       |
|                                                  | 4940              | BRONCHIECTESIS WITHOUT ACUTE EXACERBATION                                                            |
|                                                  | 4941              | BRONCHIECTASIS WITH ACUTE EXACERBATION                                                               |
|                                                  | 4959              | UNSPECIFIED ALLERGIC ALVEOLITIS AND PNEUMONITIS                                                      |
|                                                  | 515               | POSTINFLAMMATORY PULMONARY FIBROSIS                                                                  |
|                                                  | 5160              | PULMONARY ALVEOLAR PROTEINOSIS                                                                       |
|                                                  | 5161              | IDIOPATHIC PULMONARY HEMOSIDEROSIS                                                                   |
| <b>PNEUMONITIS</b>                               | 5070              | PNEUMONITIS DUE TO INHALATION (FOOD,VOMITUS,OR N.O.S.)                                               |
|                                                  | 5070              | PNEUMONITIS DUE TO INHALATION OF FOOD OR VOMITUS                                                     |
|                                                  | 5071              | PNEUMONITIS DUE TO INHALATION OF OILS AND ESSENCES                                                   |
|                                                  | 5078              | PNEUMONITIS DUE TO OTHER SOLIDS AND LIQUIDS                                                          |
|                                                  | 5130              | ABSCESS OF LUNG                                                                                      |
|                                                  | 5168              | OTHER SPECIFIED ALVEOLAR AND PARIETOALVEOLAR PNEUMONOPATHIES                                         |
|                                                  | 5183              | PULMONARY EOSINOPHILIA                                                                               |
|                                                  | 5192              | MEDIASTINITIS                                                                                        |
|                                                  | 5193              | OTHER DISEASES OF MEDIASTINUM, NOT ELSEWHERE CLASSIFIED                                              |
| <b>PLEURAL</b>                                   | 5110              | PLEURISY WITHOUT MENTION OF EFFUSION OR CURRENT TUBERCULOSIS                                         |
|                                                  | 5118              | OTHER SPECIFIED FORMS OF PLEURAL EFFUSION, EXCEPT TUBERCULOUS                                        |
|                                                  | 5119              | UNSPECIFIED PLEURAL EFFUSION                                                                         |
|                                                  | 5120              | SPONTANEOUS TENSION PNEUMOTHORAX                                                                     |
|                                                  | 5128              | OTHER SPONTANEOUS PNEUMOTHORAX                                                                       |
|                                                  | 51181             | MALIGNANT PLEURAL EFFUSION                                                                           |
|                                                  | 51189             | OTHER SPECIFIED FORMS OF EFFUSION, EXCEPT TUBERCULOUS                                                |
|                                                  |                   |                                                                                                      |
| <b>OBSTRUCTIVE SLEEP APNEA (OSA)</b>             | 32723             | OBSTRUCTIVE SLEEP APNEA (ADULT)(PEDIATRIC)                                                           |
|                                                  | 32727             | CENTRAL SLEEP APNEA IN CONDITIONS CLASSIFIED ELSEWHERE                                               |
|                                                  | 78051             | INSOMNIA WITH SLEEP APNEA                                                                            |
|                                                  | 78051             | INSOMNIA WITH SLEEP APNEA, UNSPECIFIED                                                               |
|                                                  | 78057             | OTHER AND UNSPECIFIED SLEEP APNEA                                                                    |

|       |       |                                                                |
|-------|-------|----------------------------------------------------------------|
|       | 78057 | UNSPECIFIED SLEEP APNEA                                        |
| OTHER | 514   | PULMONARY CONGESTION AND HYPOSTASIS                            |
|       | 5178  | LUNG INVOLVEMENT IN OTHER DISEASES CLASSIFIED ELSEWHERE        |
|       | 518   | OTHER DISEASES OF LUNG                                         |
|       | 5180  | PULMONARY COLLAPSE                                             |
|       | 5185  | PULMONARY INSUFFICIENCY FOLLOWING TRAUMA AND SURGERY           |
|       | 5186  | ALLERGIC BRONCHOPULMONARY ASPERGILLOSIS                        |
|       | 51883 | CHRONIC RESPIRATORY FAILURE                                    |
|       | 51900 | TRACHEOSTOMY COMPLICATION, UNSP.                               |
|       | 51909 | OTHER TRACHEOSTOMY COMPLICATIONS                               |
|       | 5191  | OTHER DISEASES OF TRACHEA AND BRONCHUS, NOT ELSEWHERE CLASSIF. |
|       | 5198  | OTHER DISEASES OF RESPIRATORY SYSTEM, NOT ELSEWHERE CLASSIFIED |
|       | 5199  | UNSPECIFIED DISEASE OF RESPIRATORY SYSTEM                      |
|       | 51911 | ACUTE BRONCHOSPASM                                             |
|       | 51919 | OTHER DISEASES OF TRACHEA BRONCHUS                             |
|       | 786   | SYMPTOMS INVOLVING RESPIRATORY SYSTEM & OTHER CHEST SYMPTOMS   |
|       | 78607 | WHEEZING                                                       |
|       | 78609 | OTHER DYSPNEA AND RESPIRATORY ABNORMALITY                      |
|       | 7990  | ASPHYXIA                                                       |
|       | 7990  | ASPHYXIA AND HYPOXEMIA                                         |
|       | 9973  | RESPIRATORY COMPLICATIONS, NOT ELSEWHERE CLASSIFIED            |
|       | 99739 | OTHER RESPIRATORY COMPLICATIONS                                |
